# Supplementary material for: Efficacy and Safety of Emergent Balloon Aortic Valvuloplasty as a Rescue Therapy for Cardiogenic Shock Due to Severe Aortic Stenosis in Non-TAVI Centers
Source: Research Square preprint supplement (doi:10.21203/rs.3.rs-5993165/v1), 2025-02-14
Supplement: Supplementary file 1 [file 295565e8984782afcbfa5951.docx]

**Table 1. Baseline patient characteristics**

| Variables | Emergent  (n=10) | Non-emergent  (n=15) | P value |
| --- | --- | --- | --- |
| **Clinical characteristics** |  |  |  |
| Age | 85.7±6.7 | 89.3±5.6 | 0.16 |
| Male, n (%) | 2 (20.0) | 7 (46.7) | 0.23 |
| BMI (kg/m2) | 23.0±6.6 | 19.4±3.5 | 0.09 |
| NYHA class III/IV, n (%) | 10 (100.0) | 15 (100.0) |  |
| **Comorbidity** |  |  |  |
| Hypertension, n (%) | 8 (80.0) | 13 (86.7) | 1.00 |
| Diabetes, n (%) | 5 (50.0) | 4 (26.7) | 0.40 |
| Hemodialysis, n (%) | 0 (0) | 1 (6.7) | 1.00 |
| Atrial fibrillation, n (%) | 3 (30.0) | 4 (26.7) | 1.00 |
| Prior MI, n (%) | 0 (0) | 2 (13.3) | 0.23 |
| **Laboratory data** |  |  |  |
| Hemoglobin (g/dL) | 11.1±2.9 | 10.7±2.8 | 0.76 |
| Albumin (g/dL) | 3.4±0.6 | 3.4±0.6 | 0.96 |
| Creatinine (mg/dL) | 1.1±0.3 | 1.6±1.4 | 0.23 |
| BNP (pg/mL), median [IQR] | 1501.0 (1214.8-1982.1) | 2089.2 (904.6-4088.5) | 0.31 |
| **Risk score** |  |  |  |
| STS score (%) | 40.2±13.0 | 18.7±9.7 | <0.01 |
| Clinical frailty scale | 3.8±1.0 | 3.8±0.9 | 0.73 |
| **Preoperative data** |  |  |  |
| LVEF (%) | 39.7±13.1 | 38.5±14.1 | 0.83 |
| Peak aortic velocity (m/s) | 4.5±0.4 | 4.3±0.9 | 0.58 |
| Mean PG (mmHg) | 67.2±26.1 | 63.1±25.6 | 0.71 |
| AVA (cm2) | 0.4±0.2 | 0.5±0.2 | 0.13 |
| AR grade≥3, n (%) | 0 (0) | 0 (0) |  |
| **State on admission** |  |  |  |
| Catecholamine, n (%) | 8 (80.0) | 14 (93.3) | 0.54 |
| IABP, n (%) | 5 (50.0) | 1 (6.7) | 0.02 |
| Systolic BP on admission (mmHg) | 95.7±31.6 | 94.5±17.9 | 0.91 |
| Lactate (mg/dL), median [IQR] | 21.5 (17.5-32.0) | 19.0 (15.3-24.0) | 0.94 |
| NIPPV, n (%) | 5 (50.0) | 6 (40.0) | 0.70 |
| Ventilator, n (%) | 4 (40.0) | 4 (26.7) | 0.67 |
| **Time to BAV from admission** | 3.5±2.1 (hours) | 5 (days, median) |  |

Qualitative data are presented as frequencies, and quantitative data are presented as means ± standard deviations or medians [interquartile ranges: IQR].

BMI, body mass index; NYHA, New York Heart Association; MI, myocardial infarction; BNP, B-type natriuretic peptide; STS, Society of Thoracic Surgeons; LVEF, left ventricular ejection fraction; PG, pressure gradient; AVA, aortic valve area; AR, atrial regurgitation; IABP, intra-aortic balloon pumping; BP, blood pressure; NIPPV, non-invasive positive pressure ventilation; BAV, balloon aortic valvuloplasty.

LVEF, peak aortic velocity and AR were measured using transthoracic echography, and the AVA and mean pressure gradient were calculated for simultaneous left ventricular and ascending aortic pressures.
